# Supplementary material for: A direct warm-white-emitting Sr3Sc(PO4)3:Eu2+, Mn2+ phosphor with tunable photoluminescence via efficient energy transfer
Source: Royal Society of Chemistry journal article supplement (doi:10.1039/c3dt32946a), 2013-01-01
Supplement: c3dt32946a.pdf [file c3dt32946a.pdf]

## Electronic supplementary information (ESI)

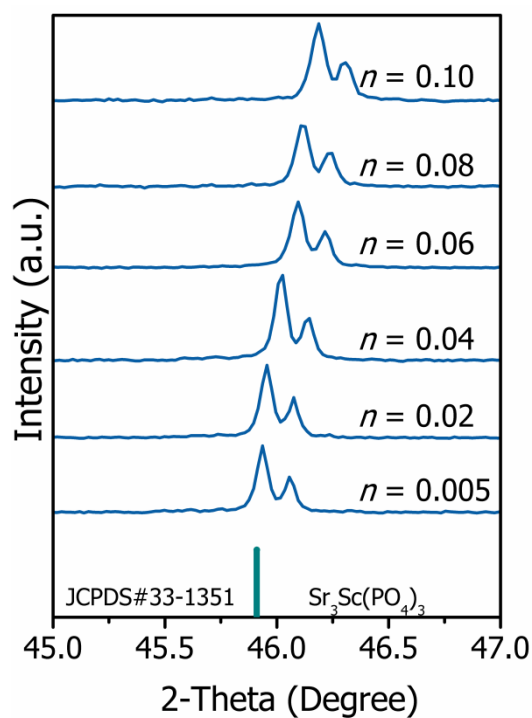

**Figure S1.** The details of the evolution on reflections near  $2\theta = 46^\circ$ .

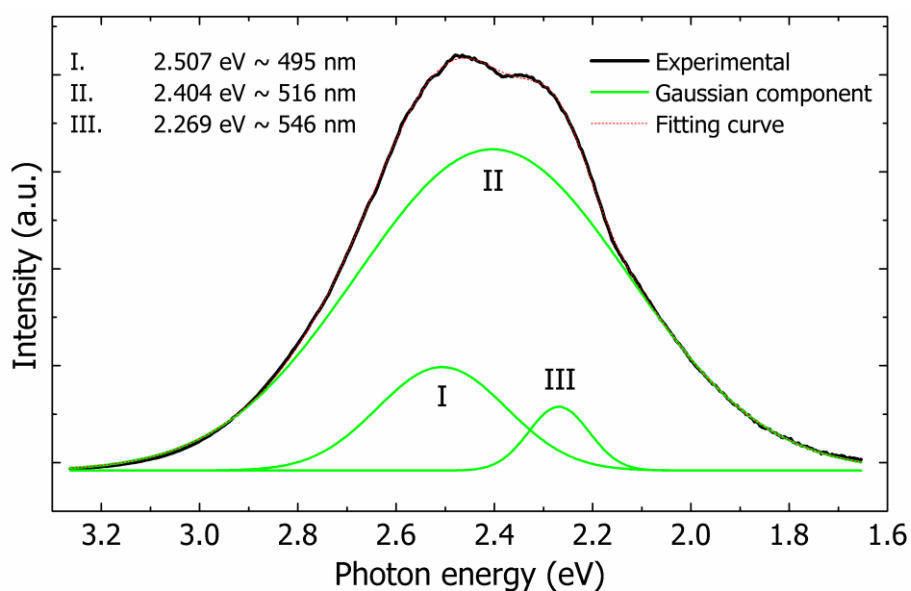

**Figure S2.** The emission spectrum of  $\text{SSP:0.005Eu}^{2+}$  and its Gaussian components on an energy scale. \_NH
